# Supplementary material
Source: Frontiers journal article supplement (https://www.frontiersin.org/articles/208156)
Supplement: Table_7.XLS [file Table_7.XLS]

## Sheet: Sheet1
Additional file 11. Primers used in this study.
Primer	sequnence (5´-3´)	miRNA
novel-m0837_5p	TGGCTCCCTGTATGCCACT
novel-m0627_3p	AAGAATTTTGGGACGGAGG
novel-m0411_5p	GCGCTTGTCGCTGATTTAGTAC
novel-m0220_3p	AGTCCCTGGAACCAAACACC
novel-m0874_3p	AAAGTCCCTGAACCAAACACC
novel-m0574_3p	CGTAATAAAGCACGGATTGACT
novel-m0057_5p	ACCCGGAACGGAGACTACC
novel-m0255_5p	TGAGACGAGATCTCCCCATA
ata-miR396a-5p	TCCACAGGCTTTCTTGAACTG
tae-MIR159a	TTTGGATTGAAGGGAGCTCTG
vvi-miR171e	TGATTGAGCCGCGCCAATAT
tae-MIR164	TGGAGAAGCAGGGCACGT
tae-miR319	GGACTGAAGGGAGCTCCCT
zma-miR156k-5p	GCTGACAGAAGAGAGCGAGCAC
sbi-miR1432	CTCAGGAGAGAUGACACCGA
tae-miR6201	CCTGAGGCACTCATACCG
u6-2	cgcaaggatgacacgcacaa
Traes_2AL_E39ADEE0D-F	CGGGCAGAGTATGTGATA	novel-m0773_3p
Traes_2AL_E39ADEE0D-R	TAGTACGCAGCCTTTCCCT	novel-m0773_3p
Traes_7AL_E3ADC8C38-F	GATGTGCTATTTCCCGGACG	novel-m0837_5p
Traes_7AL_E3ADC8C38-R	ACCAAATTGAGCATGCCTGG	novel-m0837_5p
Traes_1DL_AEC2F3FB3-F	TGGGACCATTTTCTCCACCA	novel-m0837_5p
Traes_1DL_AEC2F3FB3-R	ACCAAATTGAGCATGCCTGG	novel-m0837_5p
Traes_2AS_3EB05541D-F	GTGTACAACCTGGTGCTGG	novel-m0713_3p
Traes_2AS_3EB05541D-R	GCATCTTGATGTCGTCCCT	novel-m0713_3p
Traes_5AL_3BCA037DC-F	GGCGAATTAGAGCGTTGTT	novel-m0411_5p
Traes_5AL_3BCA037DC-R	TCGCTGATTCAACACTCCC	novel-m0411_5p
Traes_4DL_4EB63D200-F	GCATCATCTACTCCGGGCTC	novel-m0143_5p
Traes_4DL_4EB63D200-R	CCCAGAGCAGCATGTAGAGG	novel-m0143_5p
Traes_2AL_40C13C199-F	TTGGCAAAAGCAACGGATGG	novel-m0130_3p
Traes_2AL_40C13C199-R	GCCCCAGGAGTGTGAACTTT	novel-m0130_3p
Traes_5BS_9F043AE17-F	GCAAGTGCCCTGCTTCTCCAG	tae-miR164
Traes_5BS_9F043AE17-R	GCCATGGTCCAGGTAGCTCAT	tae-miR164
Traes_7AL_BE3253C8F-F	GCCCTGCTTCTCCAACAATC	tae-miR164
Traes_7AL_BE3253C8F-R	CTTGATTGCCTTGCCCATGT	tae-miR164
Traes_6DS_7B1596298-F	TGGTGCACATCATGGTTTCG	zma-miR156k-5p
Traes_6DS_7B1596298-R	GAGAGCATGCTGAAGATCCG	zma-miR156k-5p
Traes_5AS_268D29356-F	GCGTCGGTCAAGAGTCTCAA	aly-miR166c-3p
Traes_5AS_268D29356-R	CAGGAACGCTGTCAAGGTCT	aly-miR166c-3p
Traes_2AL_07B1977B8-F	ATGGGTTTAGGACTTCGGCG	ata-miR396b-5p
Traes_2AL_07B1977B8-R	ATGGGGTAGCTCGAGAGTGA	ata-miR396b-5p
TRIUR3_13391-F	CCGTCTGTACATGGTGCCTT	sbi-miR1432
TRIUR3_13391-R	CATTGCAACTTCCCGTGGTG	sbi-miR1432
TRIUR3_06776-F	CATTGAATGTCGCCGCACTC	sbi-miR1432
TRIUR3_06776-R	CAGGCGTGATGTTGCTGATC	sbi-miR1432
actin-F	TACTCCCTCACAACAACCGC
actin-R	CTCCTAGCCGTTTCCAGCTC
